# Supplementary material
Source: PubMed Central journal article supplement (PMC6754285)
Supplement: NIHMS1044708-supplement-Tables.pdf [file NIHMS1044708-supplement-Tables.pdf]

| Location<br>(abbreviation) | AAV-Cre<br>(serotype) | AAV-Cre<br>(dilution) | Coordinates<br>(A/P), (M/L) | Coordinates<br>(depth) |
|----------------------------|-----------------------|-----------------------|-----------------------------|------------------------|
| MO                         | 2/1                   | 1:15-60k              | +2.5, +1.5                  | -0.9, -0.4             |
|                            |                       |                       | +1.5, +1.5                  | -0.9, -0.4             |
|                            |                       |                       | +1.5, +2.5                  | -0.9, -0.6, -0.3       |
|                            |                       |                       | +2.3, +1.2                  | -0.9, -0.4             |
|                            |                       |                       | +1.4, +0.8                  | -0.8, -0.3             |
| SUBd                       | 2/1                   | 1:30-60k              | -3.6, +2.5                  | -1.5                   |
|                            |                       |                       | -3.05, +1.5                 | -1.5, -1.4             |
|                            |                       |                       | -3.8, +2.5                  | -1.85                  |
|                            |                       |                       | -3.2, +1.6                  | -1.6                   |
| ANT                        | 2/5                   | 1:20-45k              | -0.6, -0.8                  | -2.4                   |
|                            |                       |                       | -0.7, -0.6                  | -3.2, -2.7             |
| VAL                        | 2/5                   | 1:20-45k              | -1.8, -0.6                  | -4.1                   |
|                            |                       |                       | -0.95, -1.2                 | -3.4, -2.9             |
|                            |                       |                       | +1.4, -0.8                  | -4.0, -3.5             |
| PVH                        | 2/5                   | 1:20-45k              | -0.75, -0.3                 | -5.0                   |
| PLH                        | 2/5                   | 1:20-45k              | -0.95, -1.1                 | -4.4                   |

**Table S1.** List of viral injection coordinates. Related to Figure 1.

| Brains     | Delipidation | RI matching | IHC | Viral injections | Reconstructed neurons |
|------------|--------------|-------------|-----|------------------|-----------------------|
| 2014-06-24 | Cubic R1     | D-Sorbitol  | No  | 3                | 48                    |
| 2015-06-19 | Cubic R1     | D-Sorbitol  | No  | 2                | 15                    |
| 2015-07-11 | Cubic R1     | D-Sorbitol  | No  | 2                | 25                    |
| 2016-04-04 | Cubic R1     | D-Sorbitol  | No  | 4                | 17                    |
| 2016-07-18 | Cubic R1     | D-Sorbitol  | No  | 2                | 13                    |
| 2016-10-25 | Cubic R1     | D-Sorbitol  | No  | 4                | 23                    |
| 2016-10-31 | Cubic R1     | D-Sorbitol  | No  | 5                | 31                    |
| 2017-01-15 | Cubic R1     | D-Sorbitol  | No  | 5                | 19                    |
| 2017-02-22 | Cubic R1     | D-Sorbitol  | No  | 6                | 14                    |
| 2017-04-19 | Cubic R1     | D-Sorbitol  | No  | 6                | 22                    |
| 2017-05-04 | Cubic R1     | D-Sorbitol  | No  | 5                | 31                    |
| 2017-06-10 | Cubic R1     | D-Sorbitol  | Yes | 6                | 19                    |
| 2017-06-28 | Cubic R1     | D-Sorbitol  | No  | 6                | 48                    |
| 2017-08-10 | Cubic R1     | D-Sorbitol  | No  | 2 <sup>a</sup>   | 11                    |
| 2017-09-11 | Adipo-Clear  | D-Sorbitol  | Yes | 5                | 24                    |
| 2017-09-19 | Adipo-Clear  | D-Sorbitol  | Yes | 5                | 40                    |
| 2017-09-25 | Adipo-Clear  | D-Sorbitol  | Yes | 5                | 55                    |
| 2017-11-17 | Adipo-Clear  | OptiPrep    | Yes | 5                | 62                    |
| 2018-03-09 | Adipo-Clear  | OptiPrep    | Yes | 5                | 57                    |
| 2018-04-03 | Adipo-Clear  | OptiPrep    | Yes | 5                | 7                     |
| 2018-04-13 | Adipo-Clear  | OptiPrep    | Yes | 5                | 144                   |
| 2018-05-23 | Adipo-Clear  | OptiPrep    | Yes | 5                | 24                    |
| 2018-06-14 | Adipo-Clear  | OptiPrep    | Yes | 5                | 14                    |
| 2018-07-02 | Adipo-Clear  | OptiPrep    | Yes | 5                | 154                   |
| 2018-08-01 | Adipo-Clear  | OptiPrep    | Yes | 1 <sup>b</sup>   | 176                   |

<sup>a</sup> Rorb-Cre-1 animal.

<sup>b</sup> Sim1-Cre animal.

**Table S2.** List of imaged brains. Related to Figure 1.
